# Supplementary material for: Hydrologic benchmarking of meteorological drought indices at interannual to climate change timescales: a case study over the Amazon and Mississippi river basins
Source: Copernicus journal article supplement (doi:10.5194/hess-17-4885-2013), 2013-12-06
Supplement: Supplementary file 1 [file hess-17-4885-2013-supplement.pdf]

Hydrologic benchmarking of meteorological drought indices at interannual to climate change timescales: A case study over the Amazon and Mississippi river basins

**Supplementary Material**

Based on CNRM-CM5.1 simulations, we showed that projections are highly index definition dependent (Fig.3 and Fig.4). Taking into account the strong uncertainties among CGMs, we repeat this analysis using a subset of 13 CMIP5 models (summarized in Table1) under the same RCP8.5 concentration scenario. The ensemble mean projections as well as the corresponding uncertainties are plotted in Fig. R1 over both the Amazon and the Mississippi river basin for two drought indices: SPI12 and SPEI12\_hg. Note that we could not compute the SPEI\_hg from the IPSL model as the Tmin and Tmax outputs are not available.

The projections of the areal fraction in drought are qualitatively consistent with those derived from CNRM.CM5 (cf. Fig 3 in the manuscript). Therefore, CNRM-CM5 is not an outlier among the CMIP5 models. Moreover, the difference among the different drought indices is not negligible compared to the inter-model spread shown for a given index (especially over the Mississippi) so that the index definition is as important as the choice of the model as a source of uncertainty for drought projections.

*Table S1 List of CMIP5 models used for the figure S1*

| Short Name | Originating Group(s)              | Model version<br>CMIP5 | Atmospheric Resolution<br>CMIP5 |
|------------|-----------------------------------|------------------------|---------------------------------|
| CCCMA      | CCCMA (Victoria,Canada)           | canesm2                | 128 x 64, L35                   |
| CNRM       | CNRM & CERFACS (Toulouse, France) | cnrm-cm5               | 256 x 128, L31                  |
| CSIRO      | CSIRO & QCCCE (Australia)         | csiro-mk3-6-0          | 192 x 96, L18                   |
| GFDL       | NOAA-GFDL (Princeton, USA)        | gfdl-esm2m             | 144 x 90, L24                   |
| GISS       | NASA-GISS (New York, USA)         | giss-e2-r              | 144 x 90, L40                   |
| INM        | INM (Moscow, Russia)              | inmcm4                 | 180 x 120, L21                  |
| IPSL       | IPSL (Paris, France)              | ipsl-sm5a-lr           | 96 x 96, L39                    |
| MIROC      | AORI & NIES & JAMSTEC (Japan)     | miroc-esm              | 128 x 64, L35                   |
| MOHC       | MOHC (Exeter, UK)                 | hadgem2-es             | 192 x 145, L38                  |
| MPI        | MPIM (Hamburg, Germany)           | mpi-esm-lr             | 192 x 96, L47                   |
| MRI        | MRI (Tsukuba, Japan)              | mri-cgcm3              | 320 x 160, L48                  |
| NCAR       | NCAR (Boulder, USA)               | ccsm4                  | 288 x 192, L26                  |
| NCC        | NCC (Oslo, Norway)                | noresm1-m              | 144 x 96, L26                   |

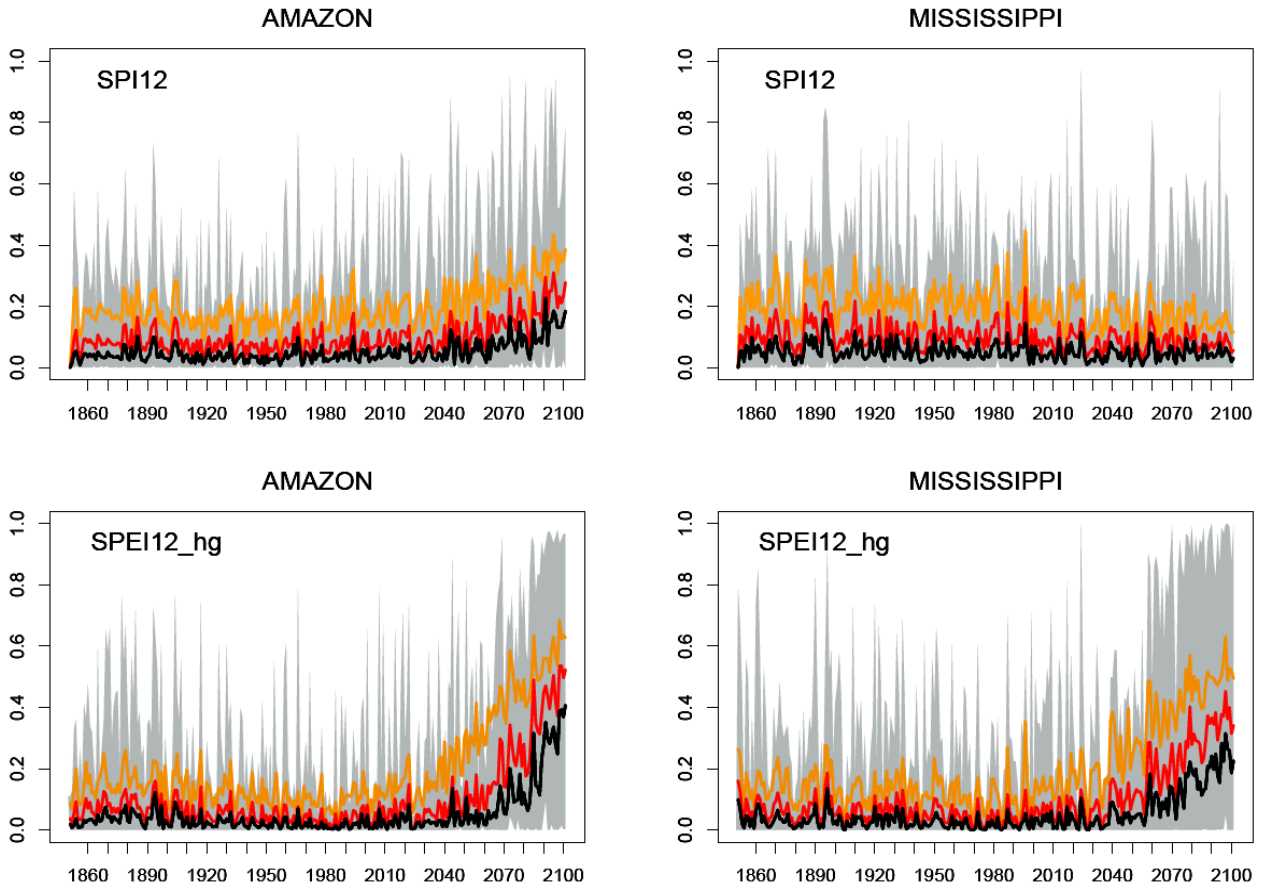

Fig S1: Time series from 1850 to 2100 of the ensemble mean value of the areal fraction in drought condition in the Amazon and Mississippi basins for a subset of 13 CMIP5 models. Moderate, severe and extreme droughts are defined locally as below the 20<sup>th</sup> (orange), the 10<sup>th</sup> (red) and the 5<sup>th</sup> (black) percentile. The grey envelop around the red line is defined by the minimum and maximum values of severe droughts among the models. Note that, as we used only one member for each model, the interannual variability is here much more stronger than in Fig3 of the manuscript where we used 5 members for the CNRM-CM5.
